# Supplementary material
Source: PubMed Central journal article supplement (PMC6640044)

Supplementary Figure 1:

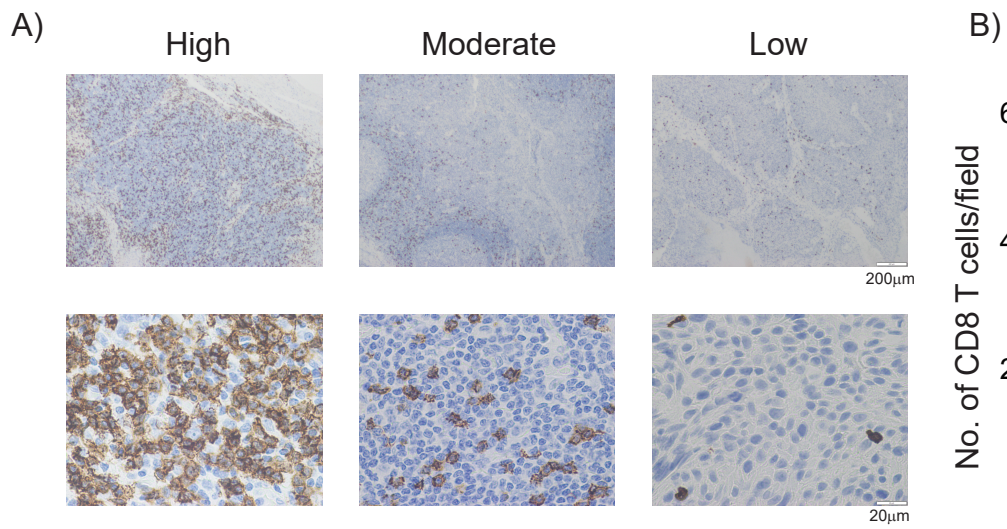

Supplementary Figure 2:

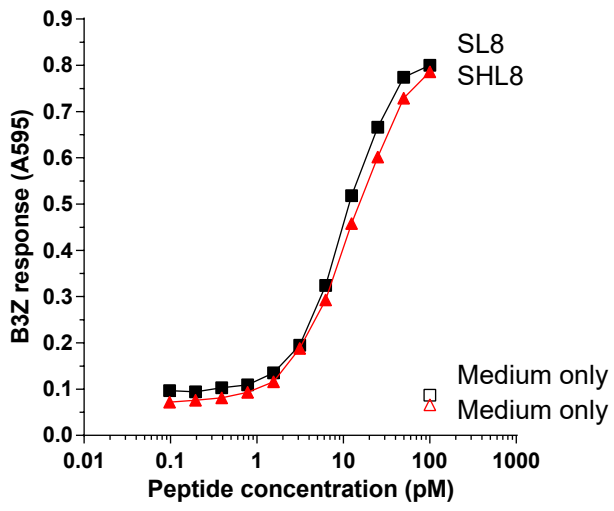

Supplementary figure 3:

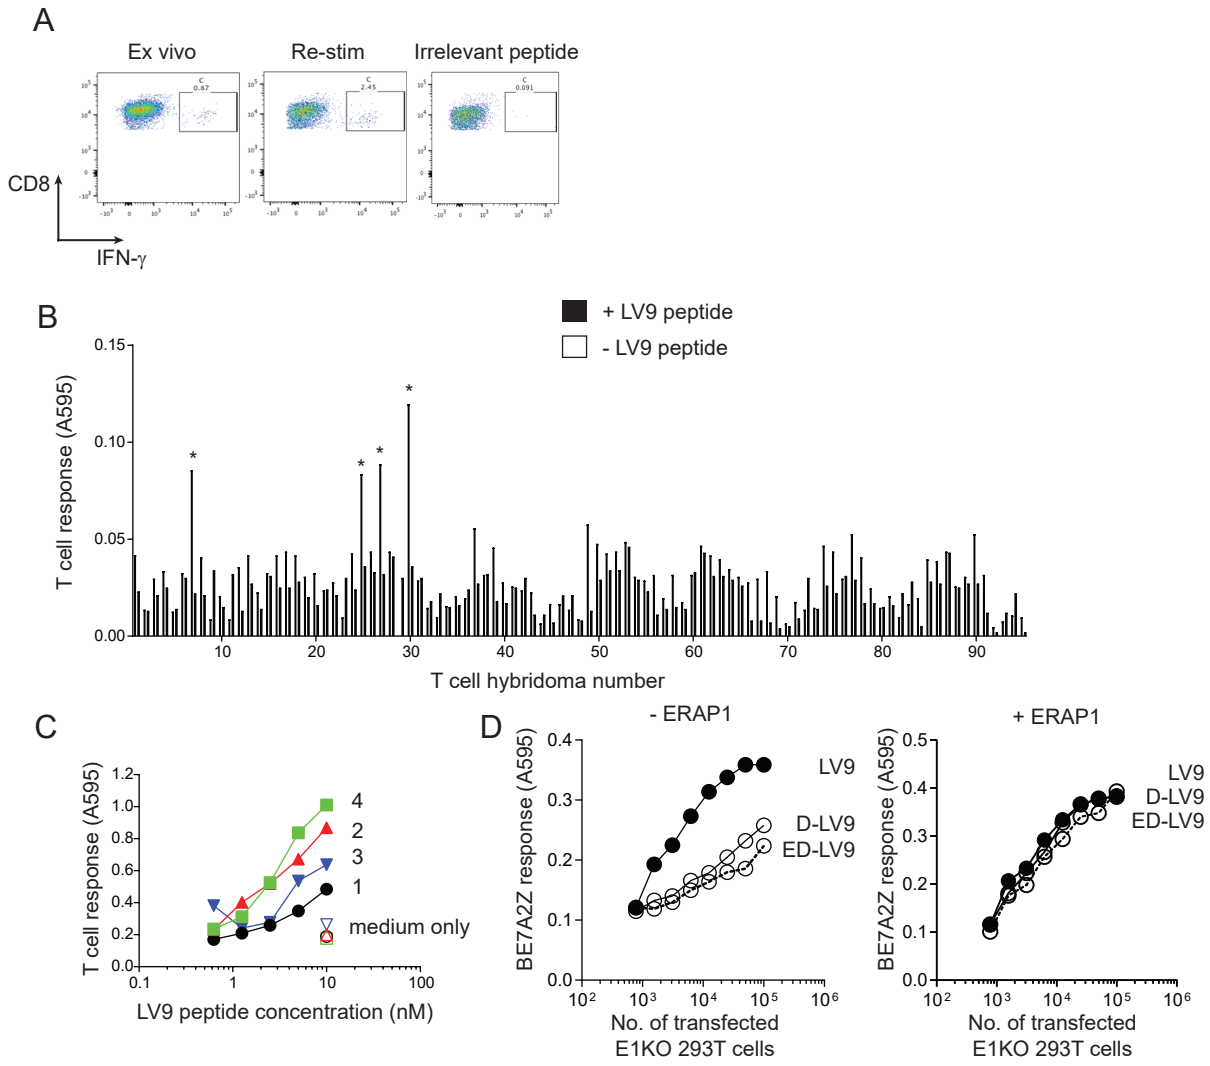

Supplementary figure 4:

**A CD8/TIL high**

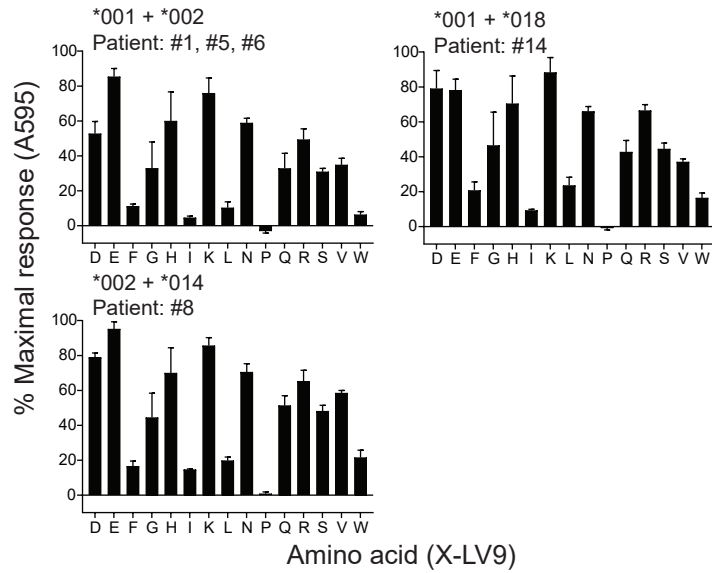

**B CD8/TIL moderate**

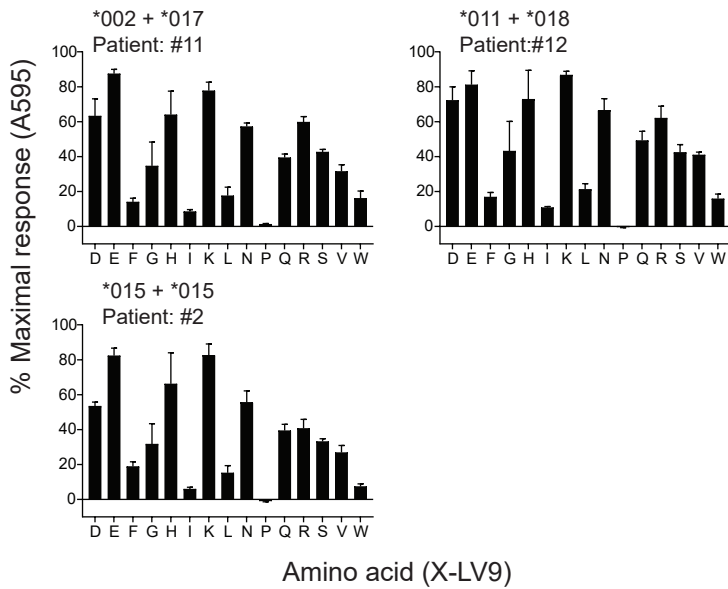

**C CD8/TIL low**

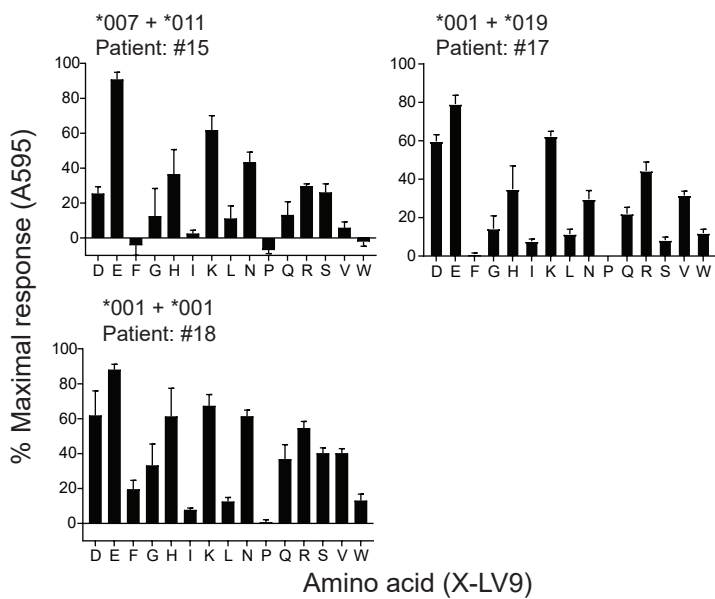

Supplement: EMS83583-supplement-Supplementary_figures.pdf [file EMS83583-supplement-Supplementary_figures.pdf]
